# Supplementary material
Source: publisher figshare collection journal article supplement (https://future-science-group.figshare.com/ndownloader/files/33960800)
Supplement: Supplementary file 1 [file 33960800]

## Supplementary Tables

**Supplementary table 1.** Prespecified DLBCL-related drugs and respective codes utilised in the study

| ATC     | Drug             |
|---------|------------------|
| L01AA01 | Cyclophosphamide |
| L01CA02 | Vincristine      |
| L01XC02 | Rituximab        |
| H02AB06 | Prednisolone     |
| L01DB01 | Doxorubicin      |
| H02AB07 | Prednisone       |
| A01AC02 | Dexamethasone    |
| L01CB01 | Etoposide        |
| L04AX03 | Methotrexate     |
| L01BC01 | Cytarabine       |
| L01AA06 | Ifosfamide       |
| V03AF01 | Mesna            |
| L01AD01 | Carmustine       |
| L01AA03 | Melphalan        |
| L01XA02 | Carboplatin      |
| L01BC05 | Gemcitabine      |
| L01DB07 | Mitoxantrone     |
| L01XA01 | Cisplatin        |
| L01AC01 | Thiotepa         |
| L01XA03 | Oxaliplatin      |

Abbreviations: ATC, The Anatomical Therapeutic Chemical Classification System

**Supplementary table 2.** Abbreviations of immunochemotherapy treatment regimens assessed in the study

| Regimen*                | Drugs                                                                                     |
|-------------------------|-------------------------------------------------------------------------------------------|
| (R-)CHOP                | Rituximab, cyclophosphamide, doxorubicin, vincristine, prednisone/prednisolone            |
| (R-)CHOEP/ (R-)DA-EPOCH | Rituximab, cyclophosphamide, doxorubicin, etoposide, vincristine, prednisone/prednisolone |
| (R-)COP                 | Rituximab, vincristine, prednisone/prednisolone                                           |
| (R-)CEOP                | Rituximab, etoposide, vincristine, prednisone/prednisolone                                |
| (R-)MINE                | Rituximab, mesna, ifosfamide, mitoxantrone, etoposide                                     |
| (R-)ICE                 | Rituximab, ifosfamide, carboplatin, etoposide                                             |
| (R-)CISGEM              | Rituximab, cisplatin, gemcitabine                                                         |
| (R-)GDP                 | Rituximab, gemcitabine, cisplatin, dexamethasone                                          |
| (R-)DHAP                | Rituximab, dexamethasone, cytarabine, cisplatin                                           |
| R-GEMOX                 | Rituximab, gemcitabine, oxaliplatin                                                       |
| MATRIX                  | Methotrexate, cytarabine, thiotepa, rituximab                                             |
| BEAM                    | Carmustine, etoposide, cytarabine, melphalan                                              |
| Unspecified regimen     | A treatment combination not fitting with any of the prespecified treatment regimens       |

\* Note that rituximab was not used to define the treatment line and thus, marked here as “(R-)” in the regimen abbreviation

**Supplementary table 3.** Annual proportion of DLBCL patients stratified according to the available information on International Prognostic Index (IPI) risk score at index, among 587 adult patients at the Hospital District of Southwest Finland during 2010–2019

| Index year | N  | N             |         | Proportion %  |         |
|------------|----|---------------|---------|---------------|---------|
|            |    | IPI available | Missing | IPI available | Missing |
| 2010       | 61 | 31            | 30      | 51.7          | 49.2    |
| 2011       | 61 | 22            | 39      | 36.1          | 63.9    |
| 2012       | 65 | 23            | 42      | 35.4          | 64.6    |
| 2013       | 69 | 37            | 32      | 53.6          | 46.4    |
| 2014       | 70 | 36            | 34      | 51.4          | 48.6    |
| 2015       | 71 | 38            | 33      | 53.5          | 46.5    |
| 2016       | 55 | 35            | 20      | 63.6          | 36.4    |
| 2017       | 59 | 28            | 31      | 47.5          | 52.5    |
| 2018       | 57 | 39            | 18      | 68.4          | 31.6    |
| 2019       | 19 | 10            | 9       | 52.6          | 47.4    |

**Supplementary table 4.** Annual proportion of DLBCL patients stratified according to the available information on stage at index, among 587 adult patients at the Hospital District of Southwest Finland during 2010–2019

| Index year | N  | N               |         | Proportion (%)  |         |
|------------|----|-----------------|---------|-----------------|---------|
|            |    | Stage available | Missing | Stage available | Missing |
| 2010       | 61 | 42              | 19      | 68.9            | 31.1    |
| 2011       | 61 | 38              | 23      | 62.3            | 37.7    |
| 2012       | 65 | 32              | 33      | 49.2            | 50.8    |
| 2013       | 69 | 34              | 35      | 49.3            | 50.7    |
| 2014       | 70 | 44              | 26      | 62.9            | 37.1    |
| 2015       | 71 | 49              | 22      | 69.0            | 31.0    |
| 2016       | 55 | 41              | 14      | 74.5            | 25.5    |
| 2017       | 59 | 33              | 26      | 55.9            | 44.1    |
| 2018       | 57 | 42              | 15      | 73.7            | 26.3    |
| 2019       | 19 | 15              | 4       | 78.9            | 21.1    |

**Supplementary table 5.** Annual proportion of DLBCL patients with and without records on immunochemotherapy/line of treatment (ICT LOT), among 587 adult patients at the Hospital District of Southwest Finland during 2010–2019

|                       | ICT LOT |      | No ICT LOT detected |      | All |
|-----------------------|---------|------|---------------------|------|-----|
| Index year            | N       | %    | N                   | %    | N   |
| 2010                  | 42      | 68.9 | 19                  | 31.1 | 61  |
| 2011                  | 46      | 75.4 | 15                  | 24.6 | 61  |
| 2012                  | 48      | 73.8 | 17                  | 26.2 | 65  |
| 2013                  | 55      | 79.7 | 14                  | 20.3 | 69  |
| 2014                  | 56      | 80.0 | 14                  | 20.0 | 70  |
| 2015                  | 55      | 77.5 | 16                  | 22.5 | 71  |
| 2016                  | 45      | 81.8 | 10                  | 18.2 | 55  |
| 2017                  | 46      | 78.0 | 13                  | 22.0 | 59  |
| 2018                  | 51      | 89.5 | 6                   | 10.5 | 57  |
| 2019 (until March 31) | 10      | 52.6 | 9                   | 47.4 | 19  |

**Supplementary table 6.** Median duration of immunochemotherapy treatment lines (ICT LOTs) determined by a Kaplan-Meier estimate, among 454 adult DLBCL patients at the Hospital District of Southwest Finland during 2010–2019.

| Strata    | N   | Events (N) | Median (days) | Lower 95% CI | Upper 95% CI |
|-----------|-----|------------|---------------|--------------|--------------|
| ICT LOT 1 | 454 | 383        | 128           | 126          | 131          |
| ICT LOT 2 | 102 | 76         | 69            | 60           | 85           |
| ICT LOT 3 | 32  | 21         | 105           | 63           | 155          |
| ICT LOT 4 | 8   | 5          | 53            | 2            | -            |

**Supplementary table 7.** The most often administered drugs related to the immunochemotherapy (ICT) of DLBCL stratified by ICT line of treatment (ICT LOT), among 454 adult DLBCL patients at the Hospital District of Southwest Finland during 2010–2019

|         |                  | ICT LOT 1 (n=454) |      | ICT LOT 2 (n=102) |      | ICT LOT 3 (n=32) |       | ICT LOT 4 (n=8) |
|---------|------------------|-------------------|------|-------------------|------|------------------|-------|-----------------|
| ATC     | Drug*            | N                 | %    | N                 | %    | N                | %     | N               |
| L01AA01 | Cyclophosphamide | 394               | 86.8 | 16                | 15.7 | <10              | <31.3 | <10             |
| L01CA02 | Vincristine      | 389               | 85.7 | 11                | 10.8 | <10              | <31.3 | <10             |
| L01XC02 | Rituximab        | 384               | 84.6 | 69                | 67.6 | 18               | 56.2  | <10             |
| H02AB06 | Prednisolone     | 350               | 77.1 | 58                | 56.9 | 12               | 37.5  | <10             |
| L01DB01 | Doxorubicin      | 337               | 74.2 | <10               | <9.8 | 0                | 0.0   | <10             |
| H02AB07 | Prednisone       | 158               | 34.8 | 21                | 20.6 | 0                | 0.0   | <10             |
| A01AC02 | Dexamethasone    | 91                | 20.0 | 39                | 38.2 | 22               | 68.8  | <10             |
| L01CB01 | Etoposide        | 84                | 18.5 | 68                | 66.7 | 12               | 37.5  | <10             |
| L04AX03 | Methotrexate     | 72                | 15.9 | <10               | <9.8 | <10              | <31.3 | 0               |
| L01BC01 | Cytarabine       | 50                | 11.0 | 21                | 20.6 | <10              | <31.3 | <10             |
| L01AA06 | Ifosfamide       | 24                | 5.3  | 60                | 58.8 | 10               | 31.3  | 0               |
| V03AF01 | Mesna            | 24                | 5.3  | 61                | 59.8 | 11               | 34.4  | <10             |
| L01AD01 | Carmustine       | 12                | 2.6  | 15                | 14.7 | <10              | <31.3 | <10             |
| L01AA03 | Melphalan        | 10                | 2.2  | 13                | 12.7 | <10              | <31.3 | <10             |
| L01XA02 | Carboplatin      | <10               | <2.2 | 23                | 22.5 | <10              | <31.3 | 0               |
| L01BC05 | Gemcitabine      | <10               | <2.2 | 14                | 13.7 | 17               | 53.1  | <10             |
| L01DB07 | Mitoxantrone     | <10               | <2.2 | 34                | 33.3 | <10              | <31.3 | 0               |
| L01XA01 | Cisplatin        | <10               | <2.2 | <10               | <9.8 | 10               | 31.3  | <10             |
| L01AC01 | Thiotepa         | <10               | <2.2 | <10               | <9.8 | <10              | <31.3 | 0               |
| L01XA03 | Oxaliplatin      | 0                 | 0.0  | <10               | <9.8 | 0                | 0     | 0               |

Abbreviations: ATC, The Anatomical Therapeutic Chemical Classification System

\* Drugs are listed according to the frequency in the first LOT and according to the ATC code

**Supplementary table 8.** Kaplan-Meier probabilities of overall survival stratified by age at index, among 587 adult DLBCL patients at the Hospital District of Southwest Finland during 2010–2019

| Time (months) | Number at risk |              | Censored   |              | Survival probability (%) |              | 95% lower CI |              | 95% upper CI |              |
|---------------|----------------|--------------|------------|--------------|--------------------------|--------------|--------------|--------------|--------------|--------------|
|               | 65 or more     | Less than 65 | 65 or more | Less than 65 | 65 or more               | Less than 65 | 65 or more   | Less than 65 | 65 or more   | Less than 65 |
| 12            | 195            | 178          | 30         | 19           | 60.0                     | 88.7         | 54.7         | 83.6         | 65.0         | 92.3         |
| 24            | 154            | 146          | 45         | 36           | 51.8                     | 80.9         | 46.4         | 74.8         | 57.0         | 85.7         |
| 36            | 111            | 124          | 72         | 52           | 45.8                     | 77.4         | 40.3         | 70.9         | 51.2         | 82.7         |
| 48            | 85             | 100          | 90         | 75           | 42.3                     | 76.7         | 36.7         | 70.1         | 47.8         | 82.1         |
| 60            | 66             | 75           | 103        | 95           | 39.1                     | 72.4         | 33.4         | 65.0         | 44.7         | 78.5         |
| 72            | 44             | 56           | 121        | 114          | 36.4                     | 72.4         | 30.5         | 65.0         | 42.3         | 78.5         |
| 84            | 23             | 33           | 140        | 136          | 34.1                     | 70.3         | 27.8         | 61.9         | 40.4         | 77.2         |
| 96            | 15             | 15           | 148        | 153          | 34.1                     | 67.5         | 27.8         | 57.5         | 40.4         | 75.7         |
| 108           | 4              | 4            | 159        | 162          | 34.1                     | 50.4         | 27.8         | 25.2         | 40.4         | 71.1         |

**Supplementary table 9.** Kaplan-Meier probabilities of overall survival stratified by the status of immunochemotherapy treatment lines (ICT LOT), among 587 adult DLBCL patients at the Hospital District of Southwest Finland during 2010–2019

| Time (months) | Number at risk |            | Censored |            | Survival probability (%) |            | 95% lower CI |            | 95% upper CI |            |
|---------------|----------------|------------|----------|------------|--------------------------|------------|--------------|------------|--------------|------------|
|               | ICT LOT        | No ICT LOT | ICT LOT  | No ICT LOT | ICT LOT                  | No ICT LOT | ICT LOT      | No ICT LOT | ICT LOT      | No ICT LOT |
| 12            | 325            | 48         | 40       | 9          | 79.7                     | 40.0       | 75.6         | 31.3       | 83.2         | 48.4       |
| 24            | 262            | 38         | 70       | 11         | 71.3                     | 33.2       | 66.8         | 25.0       | 75.4         | 41.5       |
| 36            | 207            | 28         | 107      | 17         | 66.1                     | 29.3       | 61.2         | 21.4       | 70.5         | 37.6       |
| 48            | 164            | 21         | 145      | 20         | 64.4                     | 24.8       | 59.4         | 17.2       | 68.9         | 33.1       |
| 60            | 124            | 17         | 176      | 22         | 60.4                     | 22.4       | 55.0         | 15.0       | 65.3         | 30.7       |
| 72            | 87             | 13         | 209      | 26         | 58.2                     | 22.4       | 52.6         | 15.0       | 63.3         | 30.7       |
| 84            | 50             | 6          | 243      | 33         | 55.3                     | 22.4       | 49.1         | 15.0       | 61.1         | 30.7       |
| 96            | 26             | 4          | 266      | 35         | 53.9                     | 22.4       | 47.2         | 15.0       | 60.1         | 30.7       |
| 108           | 6              | 2          | 284      | 37         | 46.0                     | 22.4       | 33.3         | 15.0       | 57.9         | 30.7       |

**Supplementary table 10.** Kaplan-Meier probabilities of overall survival from stem cell transplantation, among 25 adult DLBCL patients at the Hospital District of Southwest Finland during 2010–2019

| Time (months) | Number at risk | Censored | Survival probability (%) | 95% lower CI | 95% upper CI |
|---------------|----------------|----------|--------------------------|--------------|--------------|
| 12            | 18             | 3        | 82.7                     | 60.2         | 93.2         |
| 24            | 11             | 8        | 72.9                     | 49.1         | 86.9         |
| 36            | 8              | 10       | 66.3                     | 41.1         | 82.7         |
| 48            | 3              | 15       | 66.3                     | 41.1         | 82.7         |
| 60            | 2              | 16       | 66.3                     | 41.1         | 82.7         |
| 72            | 2              | 16       | 66.3                     | 41.1         | 82.7         |
| 84            | 2              | 16       | 66.3                     | 41.1         | 82.7         |

**Supplementary table 11.** Kaplan-Meier estimates of overall survival of all patients from the first-line immunochemotherapy, among 454 adult immunochemotherapy-treated DLBCL patients at the Hospital District of Southwest Finland during 2010–2019

| Time (months) | Number at risk | Censored | Survival probability (%) | 95% lower CI | 95% upper CI |
|---------------|----------------|----------|--------------------------|--------------|--------------|
| 12            | 321            | 41       | 79.0                     | 74.8         | 82.5         |
| 24            | 255            | 72       | 70.0                     | 65.4         | 74.2         |
| 36            | 199            | 111      | 65.0                     | 60.1         | 69.5         |
| 48            | 157            | 147      | 62.9                     | 57.9         | 67.5         |
| 60            | 116            | 182      | 60.1                     | 54.8         | 65.0         |
| 72            | 84             | 212      | 59.0                     | 53.6         | 64.0         |
| 84            | 47             | 245      | 55.3                     | 49.0         | 61.1         |
| 96            | 22             | 268      | 51.3                     | 43.2         | 58.8         |
| 108           | 1              | 289      | 51.3                     | 43.2         | 58.8         |

**Supplementary table 12.** Kaplan-Meier estimates of overall survival from the last detected line of immunochemotherapy (ICT LOT, referred as “LOT” in the table), among 454 adult immunochemotherapy-treated DLBCL patients at the Hospital District of Southwest Finland during 2010–2019

| Time (months) | Number at risk |         |         |         | Censored |         |         |         | Survival probability (%) |         |         |         | 95% lower CI |         |         |         | 95% upper CI |         |         |         |
|---------------|----------------|---------|---------|---------|----------|---------|---------|---------|--------------------------|---------|---------|---------|--------------|---------|---------|---------|--------------|---------|---------|---------|
|               | 1st LOT        | 2nd LOT | 3rd LOT | 4th LOT | 1st LOT  | 2nd LOT | 3rd LOT | 4th LOT | 1st LOT                  | 2nd LOT | 3rd LOT | 4th LOT | 1st LOT      | 2nd LOT | 3rd LOT | 4th LOT | 1st LOT      | 2nd LOT | 3rd LOT | 4th LOT |
| 3             | 314            | 54      | 18      | 5       | 8        | 2       | 1       | 1       | 91.4                     | 79.8    | 78.8    | 71.4    | 87.9         | 68.2    | 56.2    | 25.8    | 93.9         | 87.5    | 90.6    | 92.0    |
| 6             | 280            | 44      | 10      | 4       | 18       | 4       | 2       | 1       | 84.3                     | 67.8    | 46.7    | 57.1    | 80.0         | 55.2    | 25.4    | 17.2    | 87.8         | 77.5    | 65.4    | 83.7    |
| 12            | 243            | 34      | 8       | 3       | 37       | 7       | 3       | 1       | 78.8                     | 56.3    | 41.5    | 42.9    | 74.0         | 43.5    | 21.1    | 9.8     | 82.8         | 67.3    | 60.8    | 73.4    |
| 24            | 199            | 29      | 5       | 3       | 65       | 9       | 4       | 1       | 73.2                     | 51.2    | 31.1    | 42.9    | 68.0         | 38.3    | 13.2    | 9.8     | 77.7         | 62.6    | 51.0    | 73.4    |
| 36            | 159            | 20      | 5       | 2       | 98       | 16      | 4       | 2       | 70.5                     | 47.1    | 31.1    | 42.9    | 65.1         | 34.2    | 13.2    | 9.8     | 75.2         | 58.9    | 51.0    | 73.4    |
| 48            | 122            | 15      | 3       | 1       | 131      | 20      | 6       | 3       | 68.6                     | 44.6    | 31.1    | 42.9    | 63.0         | 31.6    | 13.2    | 9.8     | 73.5         | 56.8    | 51.0    | 73.4    |
| 60            | 90             | 12      | 3       | 1       | 159      | 23      | 6       | 3       | 66.0                     | 44.6    | 31.1    | 42.9    | 60.1         | 31.6    | 13.2    | 9.8     | 71.3         | 56.8    | 51.0    | 73.4    |
| 72            | 64             | 9       | 1       |         | 183      | 26      | 8       |         | 64.4                     | 44.6    | 31.1    |         | 58.2         | 31.6    | 13.2    |         | 70.0         | 56.8    | 51.0    |         |
| 84            | 36             | 5       |         |         | 208      | 30      |         |         | 60.6                     | 44.6    |         |         | 53.2         | 31.6    |         |         | 67.2         | 56.8    |         |         |

**Supplementary table 13.** Kaplan-Meier estimates of time to next immunochemotherapy treatment (ICT LOT, referred as “LOT” in the table), among 454 adult immunochemotherapy-treated DLBCL patients at the Hospital District of Southwest Finland during 2010–2019

|               | Number at risk |         |         |         | Censored |         |         |         | Treatment free proportion (%) |         |         |         | 95% lower CI |         |         |         | 95% upper CI |         |         |         |
|---------------|----------------|---------|---------|---------|----------|---------|---------|---------|-------------------------------|---------|---------|---------|--------------|---------|---------|---------|--------------|---------|---------|---------|
| Time (months) | 1st LOT        | 2nd LOT | 3rd LOT | 4th LOT | 1st LOT  | 2nd LOT | 3rd LOT | 4th LOT | 1st LOT                       | 2nd LOT | 3rd LOT | 4th LOT | 1st LOT      | 2nd LOT | 3rd LOT | 4th LOT | 1st LOT      | 2nd LOT | 3rd LOT | 4th LOT |
| 3             | 391            | 69      | 24      | 5       | 8        | 2       | 1       | 1       | 87.8                          | 69.4    | 77.8    | 71.4    | 84.4         | 59.4    | 58.9    | 25.8    | 90.5         | 77.4    | 88.7    | 92.0    |
| 6             | 323            | 55      | 13      | 4       | 18       | 4       | 2       | 1       | 74.6                          | 57.2    | 44.2    | 57.1    | 70.2         | 46.9    | 26.3    | 17.2    | 78.4         | 66.2    | 60.7    | 83.7    |
| 12            | 272            | 43      | 9       | 3       | 37       | 7       | 3       | 1       | 67.0                          | 47.4    | 33.2    | 42.9    | 62.4         | 37.2    | 17.1    | 9.8     | 71.2         | 56.9    | 50.1    | 73.4    |
| 24            | 213            | 31      | 5       | 3       | 65       | 9       | 4       | 1       | 59.0                          | 36.1    | 22.1    | 42.9    | 54.1         | 26.5    | 9.2     | 9.8     | 63.5         | 45.7    | 38.6    | 73.4    |
| 36            | 166            | 21      | 5       | 2       | 98       | 16      | 4       | 2       | 54.8                          | 32.1    | 22.1    | 42.9    | 49.8         | 22.7    | 9.2     | 9.8     | 59.5         | 41.8    | 38.6    | 73.4    |
| 48            | 126            | 15      | 3       | 1       | 131      | 20      | 6       | 3       | 52.3                          | 28.9    | 22.1    | 42.9    | 47.2         | 19.8    | 9.2     | 9.8     | 57.1         | 38.8    | 38.6    | 73.4    |
| 60            | 92             | 12      | 3       | 1       | 159      | 23      | 6       | 3       | 49.4                          | 28.9    | 22.1    | 42.9    | 44.1         | 19.8    | 9.2     | 9.8     | 54.5         | 38.8    | 38.6    | 73.4    |
| 72            | 65             | 9       | 1       |         | 183      | 26      | 8       |         | 47.5                          | 28.9    | 22.1    |         | 42.0         | 19.8    | 9.2     |         | 52.8         | 38.8    | 38.6    |         |
| 84            | 36             | 5       |         |         | 208      | 30      |         |         | 43.9                          | 28.9    |         |         | 37.7         | 19.8    |         |         | 49.9         | 38.8    |         |         |
| 96            | 17             |         |         |         | 225      |         |         |         | 39.8                          |         |         |         | 32.1         |         |         |         | 47.5         |         |         |         |
| 108           | 1              |         |         |         | 241      |         |         |         | 39.8                          |         |         |         | 32.1         |         |         |         | 47.5         |         |         |         |

**Supplementary table 14.** Kaplan-Meier probabilities of overall survival stratified by IPI risk score/data missing, among 587 adult DLBCL patients at the Hospital District of Southwest Finland during 2010–2019

| Time (months) | Number at risk |    |     |    |    |   |          | Censored |    |    |    |    |   |          | Survival probability (%) |       |      |      |      |      |          | 95% lower CI |      |      |      |      |      |          | 95% upper CI |      |      |      |      |      |          |
|---------------|----------------|----|-----|----|----|---|----------|----------|----|----|----|----|---|----------|--------------------------|-------|------|------|------|------|----------|--------------|------|------|------|------|------|----------|--------------|------|------|------|------|------|----------|
|               | 0              | 1  | 2   | 3  | 4  | 5 | Mis sing | 0        | 1  | 2  | 3  | 4  | 5 | Mis sing | 0                        | 1     | 2    | 3    | 4    | 5    | Mis sing | 0            | 1    | 2    | 3    | 4    | 5    | Mis sing | 0            | 1    | 2    | 3    | 4    | 5    | Mis sing |
| 3             | 27             | 74 | 109 | 93 | 56 | 9 | 121      | 1        | 3  | 0  | 7  | 3  | 1 | 1        | 100.0                    | 100.0 | 98.2 | 93.3 | 89.2 | 82.5 | 65.6     |              |      | 93.0 | 86.5 | 78.7 | 46.1 | 58.2     |              |      | 99.6 | 96.8 | 94.7 | 95.3 | 71.9     |
| 6             | 27             | 73 | 101 | 82 | 48 | 7 | 100      | 1        | 4  | 4  | 8  | 4  | 2 | 2        | 100.0                    | 100.0 | 94.5 | 83.3 | 78.0 | 72.2 | 54.6     |              |      | 88.3 | 74.4 | 65.6 | 35.7 | 47.2     |              |      | 97.5 | 89.2 | 86.3 | 90.2 | 61.5     |
| 12            | 25             | 69 | 88  | 64 | 38 | 7 | 82       | 3        | 8  | 9  | 15 | 9  | 2 | 3        | 100.0                    | 100.0 | 86.8 | 71.6 | 69.6 | 72.2 | 45.3     |              |      | 78.7 | 61.6 | 56.5 | 35.7 | 38.0     |              |      | 92.0 | 79.5 | 79.4 | 90.2 | 52.3     |
| 24            | 21             | 60 | 70  | 49 | 29 | 7 | 64       | 4        | 11 | 20 | 24 | 13 | 2 | 7        | 87.5                     | 91.3  | 79.6 | 64.4 | 60.3 | 72.2 | 37.5     | 66.1         | 81.7 | 70.4 | 53.7 | 46.6 | 35.7 | 30.5     | 95.8         | 96.0 | 86.2 | 73.2 | 71.5 | 90.2 | 44.5     |
| 36            | 21             | 48 | 58  | 36 | 18 | 5 | 49       | 4        | 21 | 28 | 34 | 21 | 3 | 13       | 87.5                     | 88.2  | 74.8 | 60.1 | 53.1 | 60.2 | 31.8     | 66.1         | 77.8 | 64.8 | 49.1 | 38.8 | 24.4 | 25.1     | 95.8         | 93.9 | 82.3 | 69.4 | 65.4 | 83.2 | 38.8     |
| 48            | 17             | 38 | 43  | 27 | 15 | 4 | 41       | 8        | 28 | 42 | 42 | 24 | 4 | 17       | 87.5                     | 82.4  | 73.4 | 58.3 | 53.1 | 60.2 | 29.2     | 66.1         | 70.2 | 63.3 | 47.1 | 38.8 | 24.4 | 22.6     | 95.8         | 89.9 | 81.2 | 68.0 | 65.4 | 83.2 | 36.0     |
| 60            | 12             | 28 | 34  | 22 | 14 | 3 | 28       | 12       | 37 | 48 | 46 | 25 | 5 | 25       | 82.0                     | 80.2  | 68.1 | 55.9 | 53.1 | 60.2 | 25.1     | 58.5         | 67.4 | 56.8 | 44.1 | 38.8 | 24.4 | 18.7     | 92.9         | 88.4 | 77.0 | 66.1 | 65.4 | 83.2 | 32.0     |
| 72            | 7              | 22 | 19  | 17 | 12 | 2 | 21       | 17       | 43 | 62 | 50 | 26 | 6 | 31       | 82.0                     | 80.2  | 65.9 | 52.8 | 49.3 | 60.2 | 24.1     | 58.5         | 67.4 | 54.0 | 40.2 | 34.3 | 24.4 | 17.7     | 92.9         | 88.4 | 75.3 | 63.9 | 62.6 | 83.2 | 31.1     |
| 84            | 4              | 15 | 12  | 10 | 6  | 2 | 7        | 20       | 50 | 68 | 57 | 32 | 6 | 43       | 82.0                     | 80.2  | 60.8 | 52.8 | 49.3 | 60.2 | 21.1     | 58.5         | 67.4 | 45.7 | 40.2 | 34.3 | 24.4 | 14.5     | 92.9         | 88.4 | 72.9 | 63.9 | 62.6 | 83.2 | 28.5     |
| 96            | 2              | 8  | 6   | 4  | 6  | 1 | 3        | 22       | 56 | 74 | 63 | 32 | 7 | 47       | 82.0                     | 74.0  | 60.8 | 52.8 | 49.3 | 60.2 | 21.1     | 58.5         | 55.4 | 45.7 | 40.2 | 34.3 | 24.4 | 14.5     | 92.9         | 85.8 | 72.9 | 63.9 | 62.6 | 83.2 | 28.5     |

**Supplementary table 15.** Kaplan-Meier probabilities of overall survival stratified for stages I-IV/data missing, among 587 adult DLBCL patients at the Hospital District of Southwest Finland during 2010–2019

| Time (months) | Number at risk |    |     |     |          | Censored |    |     |     |          | Survival probability (%) |      |      |      |          | 95% lower CI |      |      |      |          | 95% upper CI |      |      |      |          |
|---------------|----------------|----|-----|-----|----------|----------|----|-----|-----|----------|--------------------------|------|------|------|----------|--------------|------|------|------|----------|--------------|------|------|------|----------|
|               | I              | II | III | IV  | Mis sing | I        | II | III | IV  | Mis sing | I                        | II   | III  | IV   | Mis sing | I            | II   | III  | IV   | Missin g | I            | II   | III  | IV   | Mis sing |
| 3             | 50             | 51 | 79  | 151 | 158      | 2        | 1  | 3   | 8   | 2        | 94.4                     | 98.1 | 96.4 | 89.7 | 73.6     | 83.6         | 87.4 | 89.1 | 84.1 | 67.2     | 98.2         | 99.7 | 98.8 | 93.4 | 79.0     |
| 6             | 46             | 50 | 71  | 136 | 135      | 3        | 2  | 4   | 11  | 5        | 88.7                     | 98.1 | 87.8 | 82.5 | 64.2     | 76.5         | 87.4 | 78.5 | 75.9 | 57.4     | 94.7         | 99.7 | 93.2 | 87.4 | 70.2     |
| 12            | 44             | 44 | 63  | 108 | 114      | 4        | 7  | 6   | 24  | 8        | 86.7                     | 96.0 | 80.2 | 72.9 | 55.5     | 74.2         | 84.8 | 69.8 | 65.4 | 48.6     | 93.5         | 99.0 | 87.4 | 79.0 | 61.9     |
| 24            | 35             | 33 | 54  | 85  | 93       | 7        | 12 | 9   | 38  | 15       | 74.3                     | 82.6 | 72.5 | 66.5 | 48.6     | 59.8         | 68.1 | 61.3 | 58.5 | 41.7     | 84.2         | 90.9 | 81.0 | 73.3 | 55.2     |
| 36            | 29             | 27 | 45  | 59  | 75       | 12       | 17 | 12  | 59  | 24       | 71.8                     | 80.1 | 64.3 | 61.8 | 43.6     | 57.0         | 65.1 | 52.5 | 53.4 | 36.7     | 82.3         | 89.1 | 73.8 | 69.2 | 50.3     |
| 48            | 21             | 20 | 33  | 47  | 64       | 19       | 22 | 23  | 70  | 31       | 69.3                     | 73.5 | 62.8 | 60.8 | 41.2     | 54.0         | 56.7 | 50.9 | 52.2 | 34.3     | 80.3         | 84.7 | 72.5 | 68.3 | 47.9     |
| 60            | 19             | 16 | 27  | 34  | 45       | 20       | 23 | 28  | 82  | 45       | 66.0                     | 62.3 | 60.7 | 59.3 | 37.4     | 50.0         | 43.5 | 48.5 | 50.4 | 30.5     | 77.9         | 76.4 | 70.8 | 67.1 | 44.4     |
| 72            | 15             | 12 | 20  | 26  | 27       | 24       | 27 | 34  | 88  | 62       | 66.0                     | 62.3 | 58.0 | 55.6 | 36.5     | 50.0         | 43.5 | 45.3 | 45.8 | 29.6     | 77.9         | 76.4 | 68.8 | 64.3 | 43.5     |
| 84            | 10             | 8  | 14  | 16  | 8        | 29       | 31 | 39  | 98  | 79       | 66.0                     | 62.3 | 54.2 | 55.6 | 32.2     | 50.0         | 43.5 | 40.1 | 45.8 | 24.1     | 77.9         | 76.4 | 66.3 | 64.3 | 40.6     |
| 96            | 5              | 4  | 7   | 9   | 5        | 34       | 34 | 46  | 105 | 82       | 66.0                     | 49.8 | 54.2 | 55.6 | 32.2     | 50.0         | 23.3 | 40.1 | 45.8 | 24.1     | 77.9         | 71.6 | 66.3 | 64.3 | 40.6     |
| 108           | 1              | 1  | 3   | 2   | 1        | 37       | 37 | 50  | 112 | 85       | 33.0                     | 49.8 | 54.2 | 55.6 | 25.8     | 2.0          | 23.3 | 40.1 | 45.8 | 13.9     | 73.1         | 71.6 | 66.3 | 64.3 | 39.4     |



**Supplementary table 16.** Kaplan-Meier probabilities of time from a pathologist's diagnosis until a subsequent clinical evaluation (index) and the beginning of the first immunochemotherapy treatment line (ICT LOT), among 456 adult DLBCL patients at the Hospital District of Southwest Finland during 2010–2019

|             | Number at risk   |                        | Survival probability (%) |                        | 95% lower CI     |                        | 95% upper CI     |                        |
|-------------|------------------|------------------------|--------------------------|------------------------|------------------|------------------------|------------------|------------------------|
| Time (days) | Time until index | Time until 1st ICT LOT | Time until index         | Time until 1st ICT LOT | Time until index | Time until 1st ICT LOT | Time until index | Time until 1st ICT LOT |
| 10          | 353              | 304                    | 79.0                     | 86.9                   | 74.9             | 82.9                   | 82.6             | 90.1                   |
| 20          | 206              | 244                    | 44.5                     | 67.4                   | 39.8             | 62.2                   | 49.2             | 72.1                   |
| 30          | 88               | 150                    | 18.9                     | 42.4                   | 15.3             | 37.2                   | 22.7             | 47.6                   |
| 40          | 42               | 98                     | 9.1                      | 27.3                   | 6.6              | 22.7                   | 12.0             | 32.1                   |
| 50          | 19               | 51                     | 4.4                      | 13.7                   | 2.8              | 10.3                   | 6.7              | 17.5                   |
| 60          | 15               | 33                     | 3.5                      | 9.3                    | 2.1              | 6.5                    | 5.5              | 12.7                   |
| 70          | 13               | 14                     | 2.8                      | 4.1                    | 1.5              | 2.3                    | 4.7              | 6.5                    |
| 80          | 10               | 10                     | 2.3                      | 2.9                    | 1.2              | 1.5                    | 4.1              | 5.1                    |
| 90          | 7                | 8                      | 1.6                      | 2.3                    | 0.7              | 1.1                    | 3.2              | 4.3                    |
